# Supplementary material for: Severe COVID-19 Patients Show an Increase in Soluble TNFR1 and ADAM17, with a Relationship to Mortality
Source: MDPI journal article supplement (doi:10.3390/ijms22168423), 2021-08-05
Supplement: s1 [file s1]

Supplementary Materials

**Table S1.** Allele and genotype frequencies of the variants included in the study ( $n = 80$ ).

| Gene/<br>Variant | Allele/<br>Genotype | Control<br>$n=18$ (%) | Mild<br>$n=18$ (%) | Moderate<br>$n=22$ (%) | Severe<br>$n=22$ (%)         |
|------------------|---------------------|-----------------------|--------------------|------------------------|------------------------------|
| <i>TNFRSF1A</i>  |                     |                       |                    |                        |                              |
| rs767455         | T                   | 23 (63.9)             | 27 (75.0)          | 32 (72.1)              | 24 (54.5)                    |
|                  | C                   | 13 (36.1)             | <b>9 (25.0)</b>    | 12 (27.3)              | <b>20 (45.5)<sup>a</sup></b> |
|                  | TT                  | 8 (44.4)              | 10 (55.6)          | 11 (50.0)              | 6 (27.3)                     |
|                  | TC                  | 7 (38.9)              | <b>7 (38.9)</b>    | 10 (45.5)              | <b>12 (54.5)<sup>b</sup></b> |
|                  | CC                  | 3 (16.7)              | <b>1 (5.6)</b>     | 1 (4.5)                | <b>4 (18.2)<sup>c</sup></b>  |
| rs1800693        | T                   | 25 (69.5)             | 27 (75.0)          | 33 (75.0)              | 27 (61.3)                    |
|                  | C                   | 11 (30.5)             | 9 (25.0)           | 11 (25.0)              | 17 (38.7)                    |
|                  | TT                  | 8 (44.5)              | 10 (55.5)          | 11 (50.0)              | 6 (27.3)                     |
|                  | TC                  | 9 (50.0)              | 7 (38.9)           | 11 (50.0)              | 15 (68.2)                    |
|                  | CC                  | 1 (5.5)               | 1 (5.5)            | 0                      | 1 (4.5)                      |
| <i>TNFRSF1B</i>  |                     |                       |                    |                        |                              |
| rs1061622        | T                   | 30 (83.3)             | 35 (97.2)          | 39 (88.6)              | 40 (90.9)                    |
|                  | G                   | 6 (16.7)              | 1 (2.8)            | 5 (11.4)               | 4 (9.1)                      |
|                  | TT                  | 12 (66.7)             | 17 (94.4)          | 18 (81.8)              | 18 (81.8)                    |
|                  | TG                  | 6 (33.3)              | 1 (5.6)            | 3 (13.6)               | 4 (18.2)                     |
|                  | GG                  | 0                     | 0                  | 1 (4.5)                | 0                            |
| rs3397           | T                   | 29 (80.6)             | 27 (75.0)          | 37 (84.1)              | 40 (90.9)                    |
|                  | C                   | 7 (19.4)              | 9 (25.0)           | 7 (15.9)               | 4 (9.1)                      |
|                  | TT                  | 12 (66.7)             | 11 (61.1)          | 15 (68.2)              | 18 (81.8)                    |
|                  | TC                  | 5 (27.8)              | 5 (27.8)           | 7 (31.8)               | 4 (18.2)                     |
|                  | CC                  | 1 (5.6)               | 2 (11.1)           | 0                      | 0                            |
| <i>TNF</i>       |                     |                       |                    |                        |                              |
| rs1800629        | G                   | 36 (100.0)            | 36 (100)           | 42 (95.5)              | 41 (93.2)                    |
|                  | A                   | 0                     | 0                  | 2 (4.5)                | 3 (6.8)                      |
|                  | GG                  | 18 (100.0)            | 18 (100)           | 20 (90.9)              | 19 (86.4)                    |
|                  | GA                  | 0                     | 0                  | 2 (9.1)                | 3 (13.6)                     |
|                  | AA                  | 0                     | 0                  | 0                      | 0                            |
| rs361525         | G                   | 36 (100.0)            | 34 (94.4)          | 42 (95.5)              | 43 (97.7)                    |
|                  | A                   | 0                     | 2 (5.6)            | 2 (4.5)                | 1 (2.3)                      |
|                  | GG                  | 18 (100.0)            | 16 (88.9)          | 21 (95.5)              | 21 (95.5)                    |
|                  | GA                  | 0                     | 2 (11.1)           | 1 (4.5)                | 1 (4.5)                      |
|                  | AA                  | 0                     | 0                  | 0                      | 0                            |

Marginal associations are highlighted in bold style. <sup>a</sup>  $p = 0.0583$ , OR = 2.5(0.95–6.52); <sup>b</sup>  $p = 0.0580$ , OR = 2.8(0.72–11.31); <sup>c</sup>  $p = 0.0580$ , OR = 6.6(0.59–74.50).

**Table S2.** Dominant and recessive model analyses for the variants included in the study ( $n = 80$ ).

| Variant   | Dominant model  | Control<br>$n=18$ (%) | Mild<br>$n=18$ (%) | Moderate<br>$n=22$ (%) | Severe<br>$n=22$ (%)         |
|-----------|-----------------|-----------------------|--------------------|------------------------|------------------------------|
| rs767455  | TT              | 8 (44.4)              | 10 (55.6)          | 11 (50.0)              | 6 (27.3)                     |
|           | TC+CC           | 10 (55.6)             | <b>8 (44.4)</b>    | 11 (50.0)              | <b>16 (72.7)<sup>a</sup></b> |
| rs1800693 | TT              | 8 (44.4)              | 10 (55.6)          | 11 (50.0)              | 6 (27.3)                     |
|           | TC+CC           | 10 (55.6)             | <b>8 (44.4)</b>    | 11 (50.0)              | <b>16 (72.7)<sup>a</sup></b> |
| rs1061622 | TT              | 12 (66.7)             | 17 (94.4)          | 18 (81.8)              | 18 (81.8)                    |
|           | TG+GG           | 6 (33.3)              | 1 (5.6)            | 4 (18.2)               | 4 (18.2)                     |
| rs1800629 | GG              | 18 (100.0)            | 18 (100)           | 20 (90.9)              | 19 (86.4)                    |
|           | GA+AA           | 0                     | 0                  | 2 (9.1)                | 3 (13.6)                     |
| rs361525  | GG              | 18 (100.0)            | 16 (88.9)          | 21 (95.5)              | 21 (95.5)                    |
|           | GA+AA           | 0                     | 2 (11.1)           | 1 (4.5)                | 1 (4.5)                      |
| rs3397    | TT              | 12 (66.7)             | 11 (61.1)          | 15 (68.2)              | 18 (81.8)                    |
|           | TC+CC           | 6 (33.3)              | 7 (38.9)           | 7 (31.8)               | 4 (18.2)                     |
| Variant   | Recessive model | Control<br>$n=18$ (%) | Mild<br>$n=18$ (%) | Moderate<br>$n=22$ (%) | Severe<br>$n=22$ (%)         |
| rs767455  | TT+TC           | 15 (83.3)             | 17 (94.4)          | 21 (95.4)              | 18 (81.8)                    |
|           | CC              | 3 (16.7)              | 1 (5.6)            | 1 (4.5)                | 4 (18.2)                     |

Marginal associations are highlighted in bold style. <sup>a</sup> $p = 0.069$ , OR = 3.3(0.9–12.5).
